# Supplementary material for: The degradation of methylene blue dye using copper-doped hydroxyapatite encapsulated into polycaprolactone nanofibrous membranes
Source: Royal Society of Chemistry journal article supplement (doi:10.1039/d1nj01623g), 2021-01-01
Supplement: d1nj01623g1.pdf [file d1nj01623g1.pdf]

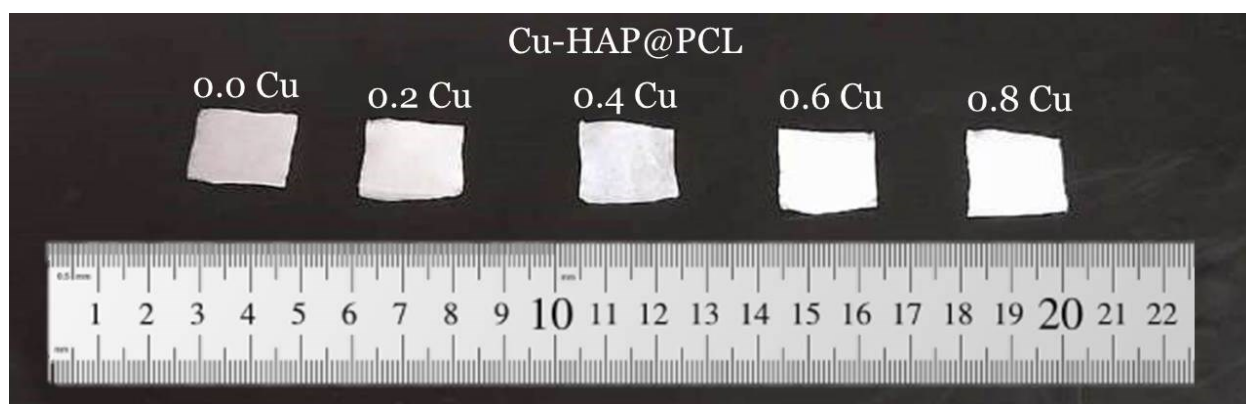

Fig. 1S Photographs for the fabricated nanofibrous membranes of Cu-HAP@PCL at different contributions of Cu ions.

**Table 1S:** Characteristic bands of nanofibers of Cu-HAP@PCL at various contents of Cu ions.

| 0.0Cu-HAP@PCL | 0.2Cu-HAP@PCL | 0.4Cu-HAP@PCL | 0.6Cu-HAP@PCL | 0.8Cu-HAP@PCL | Assignment                                 | Ref.     |
|---------------|---------------|---------------|---------------|---------------|--------------------------------------------|----------|
| 453.4         | 453.5         | 453.6         | 452.4         | 453.7         | Bending mode of ( $\nu_4$ ) of $PO_4^{3-}$ | [47-49]  |
| 567.6         | 567.3         | 566.5         | 568.3         | 557.4         |                                            |          |
| 601.2         | 602.4         | 599.5         | 601.4         | 602.4         |                                            |          |
| 960.4         | 960.4         | 960.4         | 959.4         | 960.4         | ( $\nu_1$ ) of $PO_4^{3-}$                 | [51, 52] |
| 1044.3        | 1044.5        | 1044.8        | 1043.6        | 1044.9        | Asymmetric ( $\nu_3$ ) of $PO_4^{3-}$      | [53]     |
| 1102.3        | 1102.5        | 1101.4        | 1101.7        | 1101.5        | P-O stretch                                | [54]     |
| 1181.5        | 1178.5        | 1180.4        | 1181.4        | 1179.9        | C-O-C                                      | [52, 55] |
| 1241.3        | 1240.4        | 1239.7        | 1238.8        | 1241.4        |                                            |          |
| 1291.5        | 1292.4        | 1291.5        | 1293.6        | 1291.6        | C-O and C-C                                | [51, 55] |
| 1464.6        | 1464.8        | 1462.9        | 1462.5        | 1461.5        | ( $\nu_3$ ) of                             | [54,     |

|        |        |        |        |        |                           |              |
|--------|--------|--------|--------|--------|---------------------------|--------------|
|        |        |        |        |        | $CO_3^{2-}$               | [56]         |
| 1727.5 | 1728.5 | 1728.4 | 1725.6 | 1728.6 | C=O                       | [51, 55]     |
| 2862.4 | 2861.4 | 2861.2 | 2860.4 | 2861.9 | asymmetric stretching C-H | [51, 55]     |
| 2937.4 | 2938.7 | 2937.3 | 2936.4 | 2939.4 |                           |              |
| 3433.5 | 3437.1 | 3433.4 | 3435.3 | 3434.3 | O-H stretch               | [25, 48, 52] |
| 3527.3 | 3526.4 | ---    | ---    | 3534.1 |                           |              |

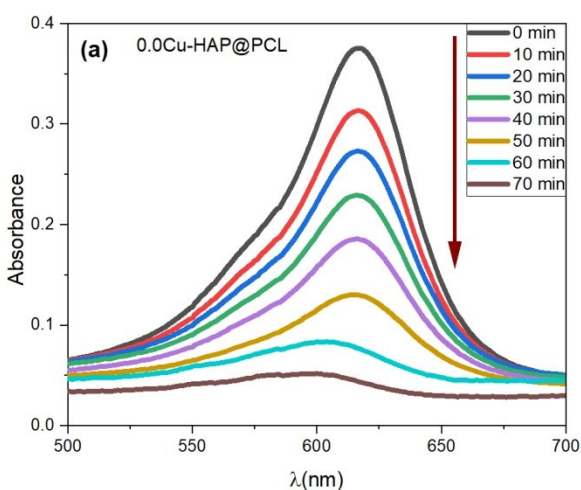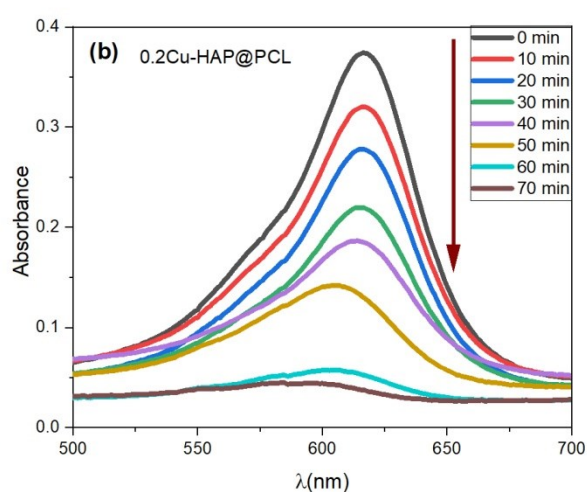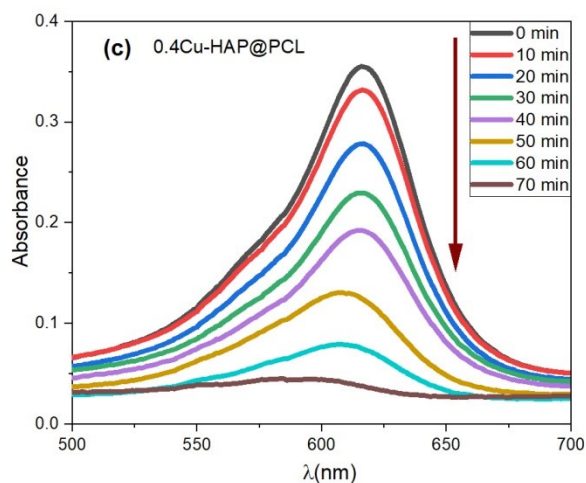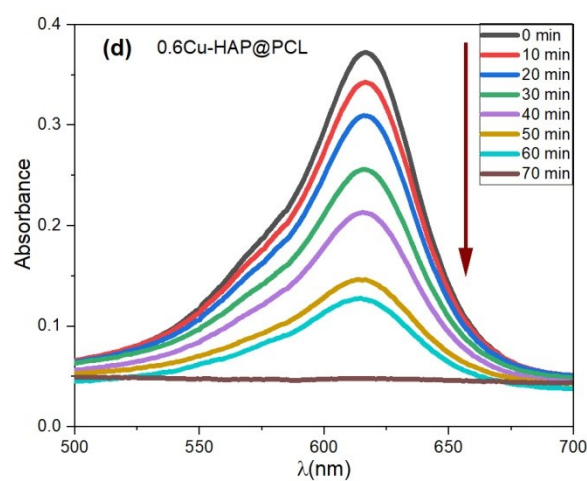

Fig. 2S MB degradation using nanofibrous membranes of Cu-HAP@PCL ; (a-d) degrading spectrum off MB under visible light.
